# Supplementary material
Source: publisher figshare collection journal article supplement (https://acs.figshare.com/ndownloader/files/4088338)

## **Supporting Information**

# **A Hydrogen Bond Sensitive Probe 5-Methoxy-1-keto-1, 2, 3, 4 tetrahydro-carbazole in the Microheterogeneity of Binary Mixtures and Reverse Micelles**

**Manas Kumar Sarangi<sup>1</sup>, Amrit Krishna Mitra<sup>2</sup>, Chaitrali Sengupta<sup>1</sup>, Sujay Ghosh<sup>1</sup>,  
Suchandra Chakraborty<sup>2</sup>, Chandan Saha<sup>2</sup> and Samita Basu<sup>1</sup> \***

*1 Chemical Sciences Division, Saha Institute of Nuclear Physics, 1/AF, Bidhannagar, Kolkata  
700 064, India*

*2 Departments of Clinical and Experimental Pharmacology, School of Tropical Medicine,  
Kolkata 700073, India*

**\*Corresponding Author:**

**E-mail address: [samita.basu@saha.ac.in](mailto:samita.basu@saha.ac.in)**

**Telephone: +91-33-2337-5345, Fax: +91-33-2337-4637**

### **Figure S1: Fluorescence Intensity in water-dioxane mixture**

While the absorption spectra show a very small shift in its absorption maxima, the fluorescence spectra undergo a very large Stokes's shift as we moved from very low water proportion to higher. We observe a very small decrease in the fluorescence intensity of MTC with increase in water, followed by an increase in the intensity with formation of h-MTC as the H-bonding of water is reestablished with higher mole fraction of water.

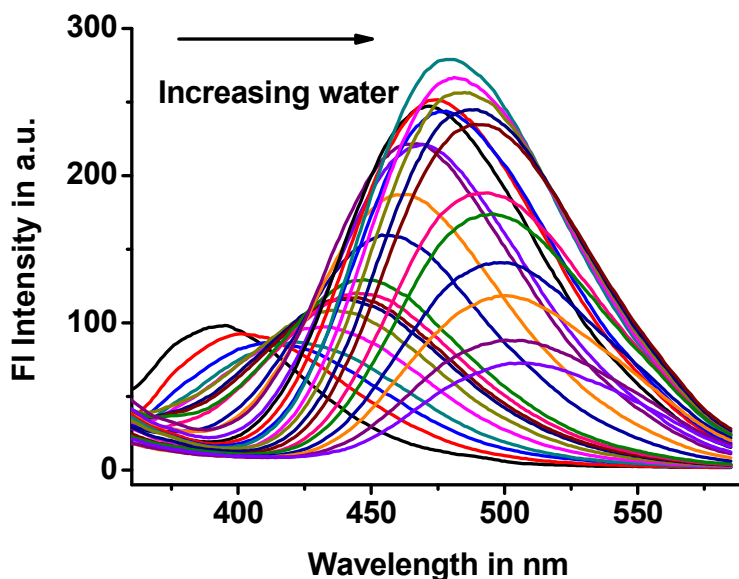

S1: Variation of fluorescence intensity of MTC ( $10\ \mu\text{M}$ ,  $\lambda_{\text{ex}} = 340\ \text{nm}$ ) in different proportion of water-dioxane mixture. The arrow indicates the variation with increase in amount of water.

**Figure S2:**

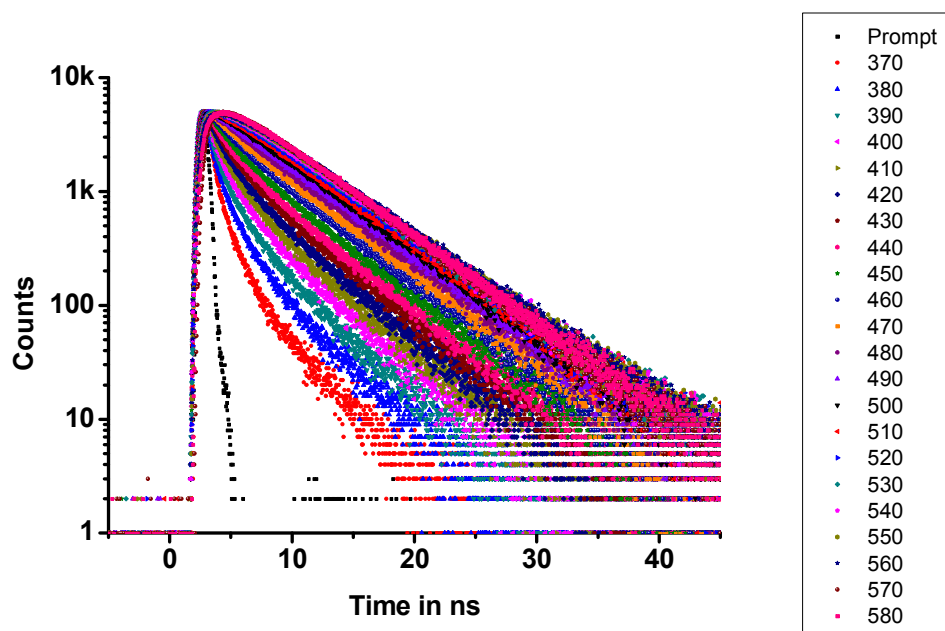

**S2:** Time-resolved fluorescence decay profiles of MTC (10  $\mu$ M,  $\lambda_{\text{ex}} = 340$  nm) in  $w_0 = 6$  for the entire emission range of 370-580nm with an increment in 10nm each.

**Figure S3**

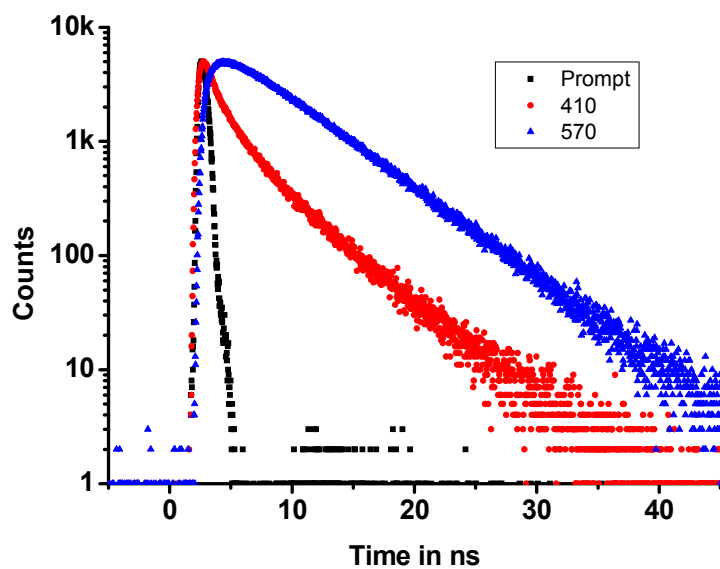

S3: Time-resolved fluorescence decay profiles of MTC ( $10 \mu\text{M}$ ,  $\lambda_{\text{ex}} = 340 \text{ nm}$ ) in  $w_0 = 6$  at emission wavelength of 410 and 570 nm respectively. The decay at the longer wavelength region is followed by a distinct growth of few orders of ns.

**Table S4**

| <b>Mole fraction of Water</b> | <b><math>\lambda_{em}</math> /nm</b> | <b><math>\tau_1^a</math> / ns</b> |
|-------------------------------|--------------------------------------|-----------------------------------|
| <b>0</b>                      | <b>416</b>                           | <b>1.41</b>                       |
| <b>0.03</b>                   | <b>422</b>                           | <b>0.595</b>                      |
| <b>0.07</b>                   | <b>427</b>                           | <b>0.472</b>                      |
| <b>0.12</b>                   | <b>432</b>                           | <b>0.466</b>                      |
| <b>0.15</b>                   | <b>438</b>                           | <b>0.473</b>                      |
| <b>0.18</b>                   | <b>443</b>                           | <b>0.596</b>                      |
| <b>0.2</b>                    | <b>447</b>                           | <b>0.534</b>                      |
| <b>0.22</b>                   | <b>452</b>                           | <b>0.780</b>                      |
| <b>0.25</b>                   | <b>452</b>                           | <b>0.901</b>                      |
| <b>0.3</b>                    | <b>456</b>                           | <b>0.964</b>                      |
| <b>0.35</b>                   | <b>458</b>                           | <b>1.090</b>                      |
| <b>0.4</b>                    | <b>465</b>                           | <b>1.960</b>                      |
| <b>0.45</b>                   | <b>473</b>                           | <b>3.210</b>                      |
| <b>0.5</b>                    | <b>479</b>                           | <b>3.900</b>                      |
| <b>0.6</b>                    | <b>483</b>                           | <b>4.320</b>                      |
| <b>0.7</b>                    | <b>486</b>                           | <b>4.320</b>                      |
| <b>0.8</b>                    | <b>493</b>                           | <b>4.600</b>                      |
| <b>0.9</b>                    | <b>500</b>                           | <b>4.700</b>                      |
| <b>1</b>                      | <b>505</b>                           | <b>4.870</b>                      |

**S4:** Fluorescence maxima (in nm) and lifetimes (in ns) of MTC (10  $\mu$ M,  $\lambda_{ex}$  = 340 nm) in different ratio of water-acetonitrile binary mixtures. a  $\pm$  10%.

**Figure S5:** Ground state energy minimized structure of MTC, (Gaussian 09, B3LYP /6-311G(d,p))

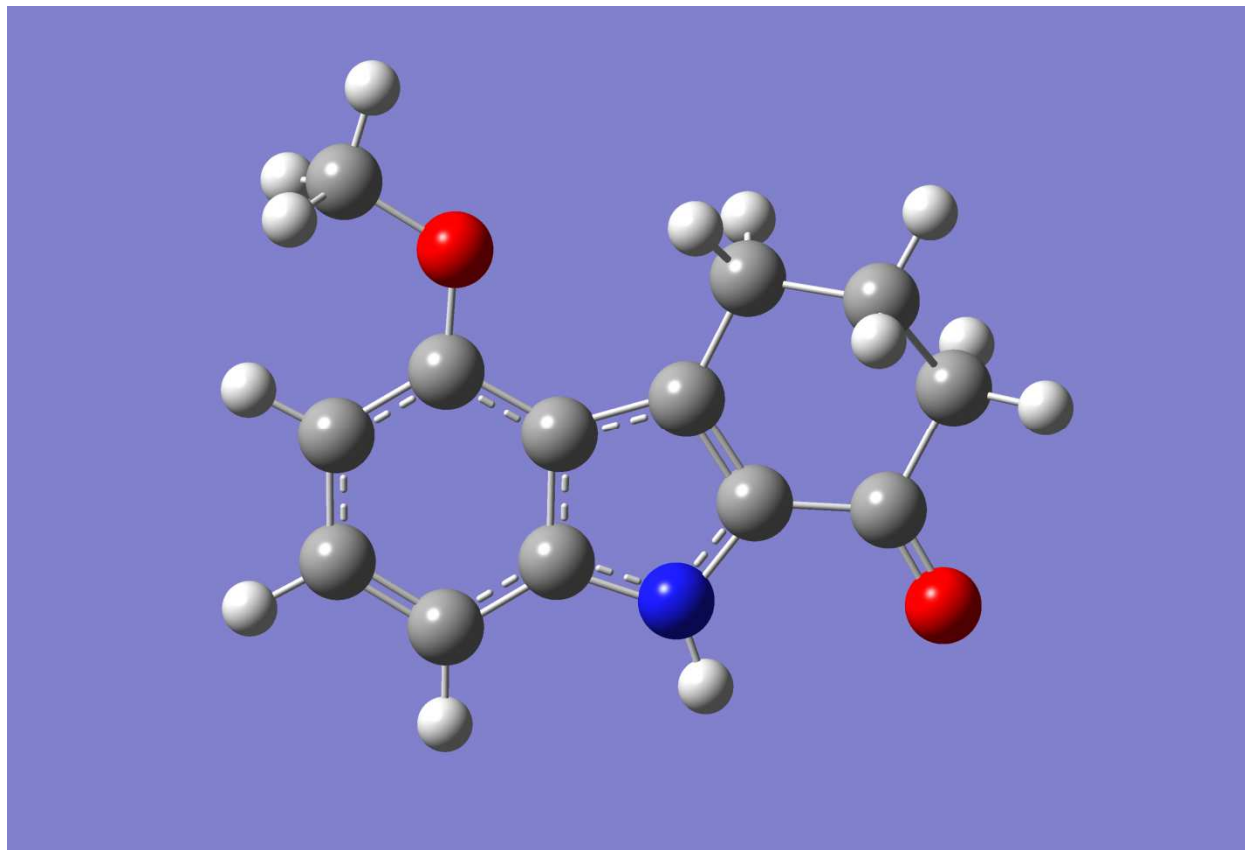

Supplement: Supplementary file 1 [file 4088338]
